# Supplementary material
Source: PubMed Central journal article supplement (PMC2635825)
Supplement: 0809420106_0809420106SI.pdf [file 0809420106_0809420106SI.pdf]

# Supporting Information

Oka *et al.* 10.1073/pnas.0809420106

## SI References

1. Slep KC, *et al.* (2001) Structural determinants for regulation of phosphodiesterase by a G protein at 2.0 Å. *Nature* 409:1071–1077.
2. Barren B, Natochin M, Artemyev NO (2006) Mutation R238E in transducin- $\alpha$  yields a GTPase and effector-deficient, but not dominant-negative, G-protein  $\alpha$ -subunit. *Mol Vis* 12:492–498.
3. Natochin M, Artemyev NO (1998) Substitution of transducin ser202 by asp abolishes G-protein/RGS interaction. *J Biol Chem* 273:4300–4303.
4. Rarick HM, Artemyev NO, Hamm HE (1992) A site on rod G protein  $\alpha$ -subunit that mediates effector activation. *Science* 256:1031–1033.
5. Berlot CH, Bourne HR (1992) Identification of effector-activating residues of G $\alpha$ . *Cell* 68:911–922.
6. Chen Z, Singer WD, Sternweis PC, Sprang SR (2005) Structure of the p115RhoGEF rgRGS domain-G $\alpha$ 13/i1 chimera complex suggests convergent evolution of a GTPase activator. *Nat Struct Mol Biol* 12:191–197.
7. Wieland T, Bahtijari N, Zhou XB, Kleuss C, Simon MI (2000) Polarity exchange at the interface of regulators of G protein signaling with G protein  $\alpha$ -subunits. *J Biol Chem* 275:28500–28506.
8. Lan KL, *et al.* (1998) A point mutation in G $\alpha$ o and G $\alpha$ i1 blocks interaction with regulator of G protein signaling proteins. *J Biol Chem* 273:12794–12797.
9. Kimple RJ, Kimple ME, Betts L, Sondek J, Siderovski DP (2002) Structural determinants for GoLoco-induced inhibition of nucleotide release by G $\alpha$  subunits. *Nature* 416:878–881.
10. Tesmer VM, Kawano T, Shankaranarayanan A, Kozasa T, Tesmer JJ (2005) Snapshot of activated G proteins at the membrane: the G $\alpha$ q-GRK2-G $\beta$  $\gamma$  complex. *Science* 310:1686–1690.
11. Day PW, *et al.* (2004) Characterization of the GRK2 binding site of G $\alpha$ q. *J Biol Chem* 279:53643–53652.
12. Venkatakrisnan G, Exton JH (1996) Identification of determinants in the  $\alpha$ -subunit of Gq required for phospholipase C activation. *J Biol Chem* 271:5066–5072.
13. Vazquez-Prado J, Miyazaki H, Castellone MD, Teramoto H, Gutkind JS (2004) Chimeric G $\alpha$ i2/G $\alpha$ 13 proteins reveal the structural requirements for the binding and activation of the RGS-like (RGL)-containing Rho guanine nucleotide exchange factors (GEFs) by G  $\alpha$  13. *J Biol Chem* 279:54283–54290.
14. Beane WS, Voronina E, Wessel GM, McClay DR (2006) Lineage-specific expansions provide genomic complexity among sea urchin GTPases. *Dev Biol* 300:165–179.
15. Suga H, *et al.* (1999) Extensive gene duplication in the early evolution of animals before the parazoa-eumetazoan split demonstrated by G proteins and protein tyrosine kinases from sponge and hydra. *J Mol Evol* 48:646–653.
16. Seack J, Kruse M, Muller WE (1998) Evolutionary analysis of G-proteins in early metazoans: cloning of  $\alpha$ - and  $\beta$ -subunits from the sponge *Geodia cydonium*. *Biochim Biophys Acta* 1401:93–103.



|                      |                                                                                                             |
|----------------------|-------------------------------------------------------------------------------------------------------------|
| Dr_α <sub>v1</sub>   | TKQELTSFKPAVLDNLLTSMKFV LHGMGVL--RINLANPNKVVHAHSVLSLSC---GRCFDED-----QMLFPFIAHALCCLWADPGVRRSSAARGYEYEL 154  |
| Ga_α <sub>v1</sub>   | TKQELCSFKPAVLDNLLTSMKFV LHGMGVL--RINLANTRNKVHAHSVLSLSC---GRCFDED-----TVLFPFLGHALSCLLADQGVRAAAAARGYEYEL 153  |
| Tr_α <sub>v1</sub>   | TKQELITFKPAVLDNLLTSMKFV LHGMGVL--RINLANSRNKVVHAHSVLSLSC---GRCFDED-----QVLLPFLSHAFSCLWSDQGVRSAAVARGYEYEL 152 |
| Tn_α <sub>v1</sub> * | TRQELLTFKPAVLDNLLTSMKFV LHGMGAL--RINLNSRNKVVHAHVLSLSC---GRCFDED-----QVLLPVLGHAFCTLWSDQGVRSAAVARGYEYQL 152   |
| Oi_α <sub>v1</sub>   | SGHELLSFKPAVLDNLLTSMKFV LHGMGLL--HINLANSRNKVVHARCVLAC---GRCFDEE-----QVLRPFVGHALSCLWADQGVRAAAAQGCYEYEL 152   |
| Sa_α <sub>v1</sub> * | TEEELTSFKPAVLDNLLSSMKFVLQGMGIL--RINLANPKNTIHAQTVLSLSC---GRCFDED-----YALFPFMAHALRCLWADQQRVLAASRGYEFEL 153    |
| Cm_α <sub>v1</sub> † | -----KPAVLDNLLSSMKFVLQGMGIL--RINLAIPRNTTHAQTVLSLSC---GRCFDED-----ETLLPFVGHALRCLWADPAVRLAASRGYEFEL 124       |
| Bf_α <sub>v</sub>    | SQEELNSFKPTLMDNLLSTMKFV LSGMGLL--RINLSNPNNKIHAQTVLSS---RRGFGED-----LIMFPFVTHALRCLWSDQGVRLAVARGYEYEL 151     |
| Sp_α <sub>v</sub> †  | TDYELMSFKPAVLDNLLNSMKYV LNGMGLL--RIPLANSKNK-----LIMFPFVTHALRCLWSDQGVRLAVARGYEYEL 103                        |
| Oi_α <sub>v2</sub>   | SKEELSSFKPAVLDNLLTSMKIVLRGMGKL--RINLANQKNKVVHACSVLSLSC---SQCLGED-----QELHPFIAHAFCALWADLGVKVAAAARGYEFQL 151  |
| Ga_α <sub>v2</sub>   | SETELLSFKAAVLDNLLTSMKFV LRGMGTL--RINLANKNKTWARSVLSLSC---GQCLGDD-----QELLPFVAHAICALWADQGVRAAAAARGYEFEL 153   |
| Tr_α <sub>v2</sub>   | SKQELTTFKPAVLDNLLTSMKFV LRGMGML--RINLANKNKMHARSVLSLSC---SQCFGED-----QELLPFVAHAFCALWSDHGFRAAAAARGYEFEL 153   |
| Tn_α <sub>v2</sub>   | SKQELISFKPAVLDNLLTSIKFV LQGMGML--RINLANRKNRTHARALLSLSC---DRCAGDD-----QELLPFVAHAFCALCSDHGFRAAVARGHEFEL 153   |
| Lg_α <sub>v</sub>    | SKHELRSFKTAVLDNLVSSMKFV LAGMGLL--RVNLENPKNKLYAQVLSLSC---MCCYDKE-----FHAMLPEIYEALKSLWKDRGIRLAVSRGYEFEL 152   |
| Tc_α <sub>v</sub>    | THAELSSFRTVLDNLLASMKYV LAGMGLL--RINLEQQRNKSHAQAVLMS---RSCFDMS-----FTVLPNMAASLQALWSDRGVRLAVARGYEYEL 151      |
| Csp_α <sub>v</sub>   | SENELMAFRPAVLDNLLFSMKFV LSGMGLL--RINLERPYNRANAQIILSLSC---QRCYDDH-----LIILPNVAVLSQLWKDGGVRRRAISRGYEFEL 151   |
| Gc_α <sub>v</sub> *  | SQTELRSFKSVIYGNLAASMRVVLNAMEKL--GIPYGNQASQEQRVILSL---SNSLSSY-----ESFPDPVTSAFISLWRDAGVQECFSRAYEYQL 151       |
| Ef_α <sub>v1</sub> † | SKDELESFRPVIYGNLAASMRVVSNMENL--GIPFSDTTNREYANMILSL---STSIPNC-----NSLPSEVAEAFRRLWNDQGVRAACFSRAYEYQL 96       |
| Ef_α <sub>v2</sub> † | SNEELDAFKHVYKNLVASMAAIVRNMERL--GISFSDPSNSVHADTLAL---SSN-QDF-----SSMPPKLAEAIKHLWSDQGVKACFKRAYEYQI 95         |
| Hs_α <sub>t1</sub>   | SLEECLFETAIYGNLQSTLAIIVRAMTTL--NTQYGD SARQDDARKLMHM---ADTIEEG-----TMPKEMSDTIQRLWKDSG IQACFERASEYQL 144      |
| Hs_α <sub>i1</sub>   | SEEECKQYKAVVYSNTIQSIITAIIRAMGRL--KIDFGDSARADDARQLFVL---AGAAEEG-----FMTAELAGVIKRLWKDSGVQACFNRSREYQL 148      |
| Hs_α <sub>q</sub>    | SDEDKRGFTKL VYQNI FTAMQAMIRAMDTL--KIPYKYEHNKAAHQLVREVDVEKVS AFENP-----YVDAIKSLWNDPGIQECYDRRREYQL 153        |
| Hs_α <sub>12</sub>   | DQKALLEFRDTIFDNILKGSRLVLDARDKL--GIPWQYSENEKHGMF-----LMAFENKAGLPVEPATFQLYVPALSALWRD SGIREAFSRRSEFQL 175      |
| Hs_α <sub>s</sub>    | SDGEKATKVQDIKNLKEATETIVAAMSNLVPPVELANPENQFRVDYILSV---MNVPDFD-----FPPEFYEHAKALWEDEGVRA CYERSNEYQL 171        |

Fig. S1. continued

▼★★★  
 Dr\_Gα<sub>v1</sub> NDSALYFFENMGR I I-ADDYMP T E T-DVLRVRLRTTGV I ETQFKVKHLVFRMYDVGGQRTERRKWI SCF EYVRSVLFVVSLSGYDMTLVEDPSMNR LQES 252  
 Ga\_Gα<sub>v1</sub> NDSALYFFQNLTR I T-SPDYVP T E T-DVLRVRLRTTGV I ETQFKVNRLIFRMYDVGGQRTERRKWI GCFEDVRAVLFVVALSGYDMTLVEDPSMNR LQES 251  
 Tr\_Gα<sub>v1</sub> NDSALYFFENMIR I T-SPEYVP T E M-DVLRVRLRTTGV I ETQFKVKHLVFRMYDVGGQRTERRKWI GCFEDVRAVLFVVALSGYDMTLVEDPSMNR LQES 250  
 Tn\_Gα<sub>v1</sub>\* NDSALYFFENMSR I SLS E T T I P I R N P-DVLRVRLRTTGV I ETQFKVKHLVFRMYDVGGQRTERRKWI GCFEDVRAVLFVVALSGYDMTLVEEPSTNR LQES 252  
 Ol\_Gα<sub>v1</sub> NDSALYFFENLSR I T-SPDYVP T E A-DVLRVRLRTTGV I ETQFKVNHLIFRMYDVGGQRTERRKWI GCFEDVRAVLFVVALSGYDMTLLEDPHNRL QES 250  
 Sa\_Gα<sub>v1</sub>\* NDSAHYFFQNMNR I T-APEYKPTQM-DLLRVRRLRTTGV I ETQFKINNL I IRLYDVGGQRTERRKWI GCFEDVRAVLFVAALSGYDMTLLEEPSMNR LQES 251  
 Cm\_Gα<sub>v1</sub>† NDSA-----RMYDVGGQRTERRKWI GCFEEVRAVLYVAALSGYDMTLLEELTVNR LQES 178  
 Bf\_Gα<sub>v</sub> NDSALYLFENMDR I C-HEKFQPNSE-DVIRARVRTTGI E TEF A I S G I MFRMFDVGGQRTERRKWI GCFDDVKA I L F V T A L S G Y D M T L L E D S N V N R L Q E S 249  
 Sp\_Gα<sub>v</sub> † -----YFENMERLT-SEKYKPTQ-DVLRARVRTTGI E T H F K I R G V I F R L Y D V G G Q R S E R R K W I G C F D D V K A L L F V A A L S G Y D M V L F E D P E V N R L Q E S 195  
 Ol\_Gα<sub>v2</sub> NDSALYFFENISR I I-APNYVP T E T-DVLRVRVRTCG I I E T Q F Q N E M T F R L Y D V G G Q R G E R R K W L N C F D S V H A V L F V V A L S S F D L K L M E D P S V S R L Q E S 249  
 Ga\_Gα<sub>v2</sub> NDSALYFFENISR I I-APKYVP T E T-DVLRVRVRTCG I I E T Q F Q L N E M I F R L Y D V G G Q R S E R R K W L R C F D C I Q A V L F V V A L S S Y D M T Q A E D P S G N R L Q E S 251  
 Tr\_Gα<sub>v2</sub> NDSALYFFENMNR I I-APLYVP T E T-DVLRVRVRTCG I I E T Q F Q L N Q M I F R L Y D V G G Q R S Q R R K W L K C F E G I Q A V W F V A A L S S Y D T L M E A S P V N R L Q E S 251  
 Tn\_Gα<sub>v2</sub> NDSALYFFENMTR I I-APLYVP T E A-DVLRVRVRTCG I I E T H F Q H K Q T I Y R L Y D V G G Q R S G R R K W L S C F E G V Q A V W F V V A L S S Y D Q M L A E L P P M N R L K E S 251  
 Lg\_Gα<sub>v</sub> NDSAIYFFENMDR I C-SIKFQPSCT-DVLRARVRTTGI E T C F K I D G G V I R M F D V G G Q R S E R R K W I G C F D D V R C I L F V A A L S C Y D L T L F E D P S V N R L V E S 250  
 Tc\_Gα<sub>v</sub> NDSALYLFENMER I C-DPKYVP T P T-DVLRARVRTQGI E T H F R I N D M I V S M Y D V G G Q R S Q R R K W I Y C F D D V R A V L F V V S L S G Y D M T L L E D P S V N R L D E S 249  
 Csp\_Gα<sub>v</sub> NDSAIYFFENMHR L C-SEKFVPTVT-DVLRARVRTQGI E T C F K F R H C M F R M F D V G G Q R S E R R K W I H C F D N V H A I F V A A L S G Y D M T L A E D P S I N R L E E S 249  
 Gc\_Gα<sub>v</sub>\* NDSAPYYFQNMDR L L-REDYVPDEQ-DVLRSRVQT TGI E T S F R V K L T Y R V V D V G G Q R S E R R K W I G C F D D V R A V L F V C A L S G Y D M T L F E D G K T N R L E E S 249  
 Ef\_Gα<sub>v1</sub>† NDSAPYYFENMDR L L-KPDYVPDEQ-DVLRSRVQT TGI E T S F R V E K L V Y R V V D V G G Q R S E R R K W I G C F D D V K A V L F V V A L N G Y D M T L F E D G K T N R L E E S 194  
 Ef\_Gα<sub>v2</sub>† EDSASYFLGMDR L L-QSGYVPNEQ-DVLRSRVQT TGI E T S F R V K K L I Y R I V D V G G Q R A E R S K W I G C F D D V K A V L F V V A L N G Y D M T L A E D G V T N R M R E A 193

---

Hs\_Gα<sub>t1</sub> NDSAGYYLSDLERLV-TPGYVPTEQ-DVLRSRVKT TGI E T Q F S F K D L N F R M F D V G G Q R S E R R K W I H C F E G V T C I I F I A A L S A Y D M V L V E D E V N R M H E S 242  
 Hs\_Gα<sub>i1</sub> NDSAAYYLNDLDR I A-QPNYIPTQQ-DVLRTRVKT TGI E T H T F T K D L H F K M F D V G G Q R S E R R K W I H C F E G V T A I I F C V A L S D Y D L V L A E D E E M N R M H E S 246  
 Hs\_Gα<sub>q</sub> SDSTKYLLNDLDRVA-DPAYLPTQQ-DVLRVRVPT TGI I E Y P F D L Q S V I F R M V D V G G Q R S E R R K W I H C F E N V T S I M F L V A L S E Y D Q V L V E S D N E N R M E E S 251  
 Hs\_Gα<sub>12</sub> GESVKYFLDNLDRIG-QLNYFPSKQ-DILLARKATKGI VEHDFVIKKIPFKMVDVGGQRSQRKWFQCFDGI T S I L F M V S S E Y D Q V L M E D R R T N R L V E S 273  
 Hs\_Gα<sub>s</sub> IDCAQYFLDK I DVIK-QADYVPSDQ-DLLRCRVL TSGIFETK FQVDKVNFMFDVGGQRTERRKWI GCFNDVTA I I F V V A S S Y N M V I R E D N Q T N R L Q E A 269

Fig. 51. continued



Dr\_G $\alpha_{v1}$  TSNVQ<sup>★</sup>VVFQVMDTI IKENLEAVSLL---- 362  
 Ga\_G $\alpha_{v1}$  TSNVEVVFQVMDTI IKENLEAVSLL---- 361  
 Tr\_G $\alpha_{v1}$  TSNIQVVFQVMDTI IKENLEAVSLL---- 360  
 Tn\_G $\alpha_{v1}$ \* TSNIQVVFQVMDTI IKENLEAVSLL---- 361  
 Ol\_G $\alpha_{v1}$  TSSIQVVFQVMDTI IKENLQAMSL---- 360  
 Sa\_G $\alpha_{v1}$ \* TSNVQIVFQGRHGHHYKRELEAVRLL---- 361  
 Cm\_G $\alpha_{v1}$ † TSNVQVVFQVMDTI IKENLEAVSLL---- 289  
 Bf\_G $\alpha_v$  TSNIQVVFQVMDTI IRENLEAASLL---- 359  
 Sp\_G $\alpha_v$  † TGNMEVVFQVVTNTIVKDNLEAAALM---- 305  
 Ol\_G $\alpha_{v2}$  TANVQVVLHVVLNQIIEGNLAAFQPF---- 358  
 Ga\_G $\alpha_{v2}$  TTNVQVVFHVMVIDQVMKGNLAAVQLL---- 361  
 Tr\_G $\alpha_{v2}$  TASVRLVFHVMVDQIVKDNLASVQLL---- 361  
 Tn\_G $\alpha_{v2}$  TAAVRVVLHMVVDQISKDNLASVQLL---- 358  
 Lg\_G $\alpha_v$  TSNIQVVFQVMDSVLRENKAVSIL---- 360  
 Tc\_G $\alpha_v$  TANVQVVFQAVMEMVISTNLGQVTL---- 359  
 Csp\_G $\alpha_v$  TNQVQSVFQVVEGIVQANLSQAQLL---- 360  
 Gc\_G $\alpha_v$ \* TTNIKVVFGVVLDTI IRENLEAANLL---- 359  
 Ef\_G $\alpha_{v1}$ † TSNIRVVFQAVLDAI IRENLEAANLL---- 304  
 Ef\_G $\alpha_{v2}$ † TSNVRVVIDAVIEAI IRENLESIGLIREDE 307  
 Hs\_G $\alpha_{t1}$  TQNVKVFVDAVTDI I I KENLKDCGLF---- 350  
 Hs\_G $\alpha_{i1}$  TKNVQVVFDAVTDV I I KNNLKDCGLF---- 354  
 Hs\_G $\alpha_g$  TENIRFVFAAVKDTILQLNLKEYNLV---- 359  
 Hs\_G $\alpha_{12}$  TENVRFVFHAVKDTILQENLKDIMLQ---- 381  
 Hs\_G $\alpha_s$  TENIRRVFNDCRDI IQRMHRLRQYELL---- 394

#### Conservation

**Red Bold:** conserved among all G alpha classes

**Red:** 100% conserved within a class

**Blue:** 80-99% conserved within a class

**Green:** 60-79% conserved within a class

Shaded in grey: atypical residue at the conserved position

★ ★ ★: Gv specific conservation (color coded as above)

#### Modification

Shaded in purple (N-terminal): acylation sites

(C-terminal): ADP-ribosylation site by Pertussis toxin

#### Contact sites

Shaded in blue: RGS/GAP contact sites

Shaded in green: effector contact sites

Shaded in yellow: both RGS/GAP and effector contact sites

Boxed: atypical residue at contact sites (color coded as above)

#### Splice sites

∇: junction between two codons

▼: junction within a codon

▽: Gv specific junction

Fig. S1. continued



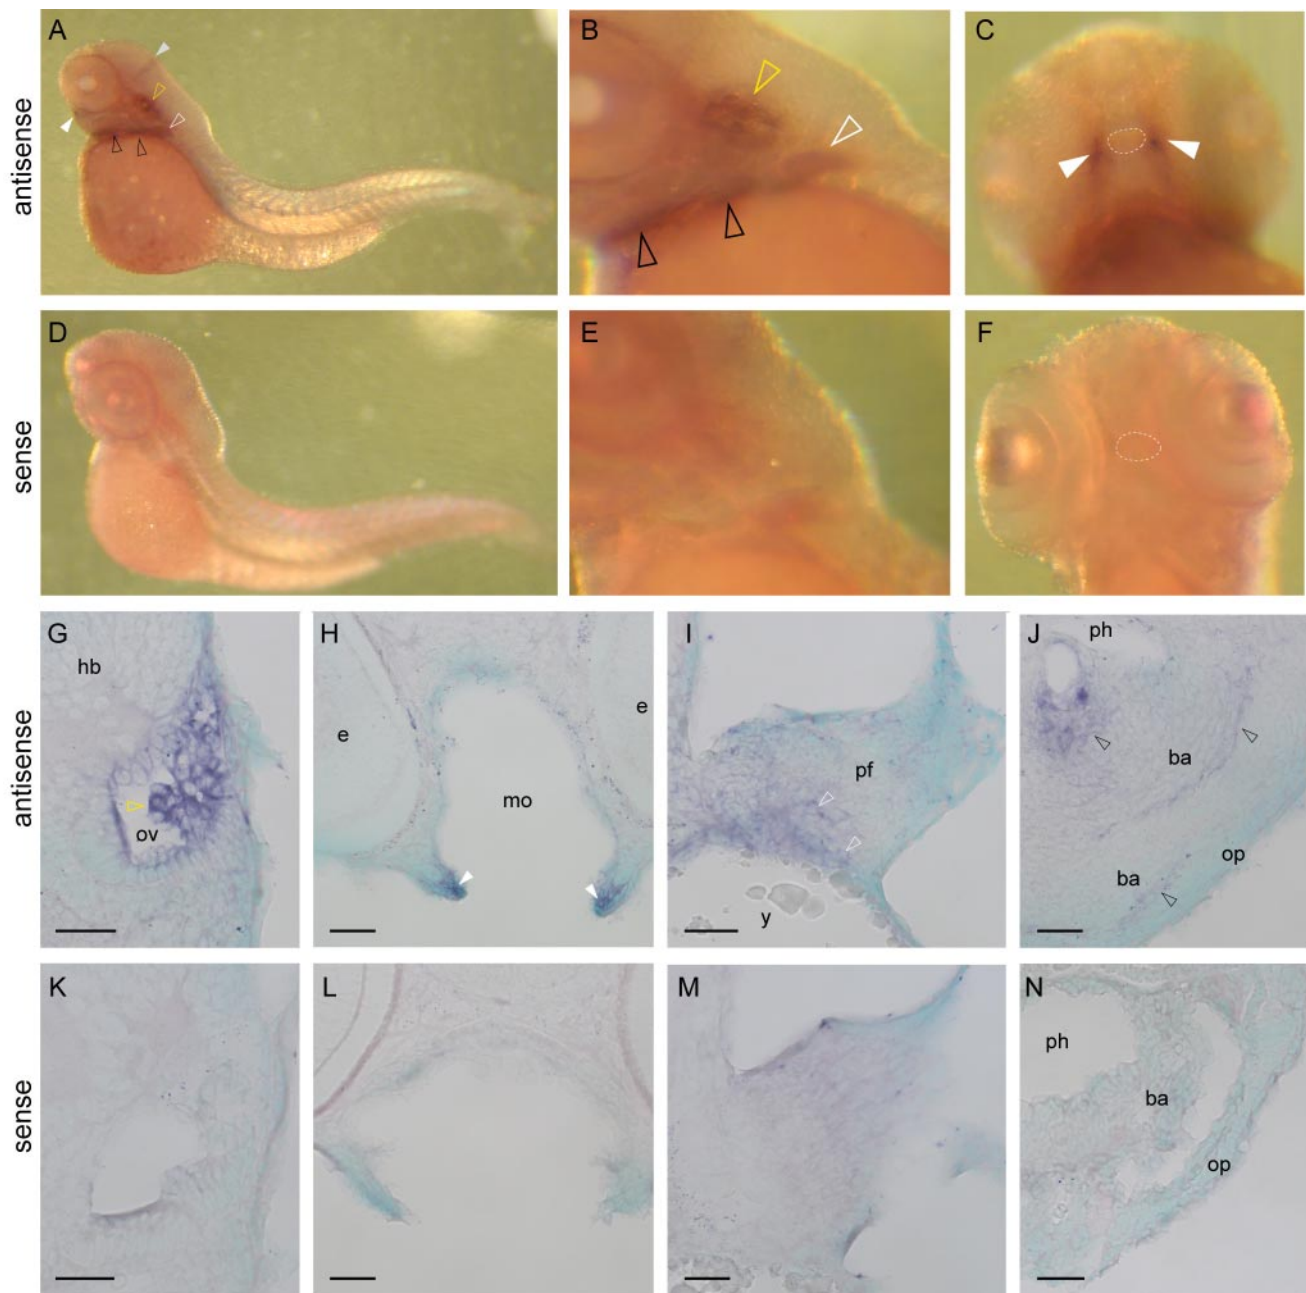

**Fig. S3.** Expression pattern of *gnav1* in zebrafish larvae: whole-mount in situ hybridization of *gnav1* probe (A–C and G–J) and negative control (sense probe, D–F and K–N) with 3 dpf zebrafish larvae. Embryos were grown in 0.0045% of phenylthiourea (Sigma) from 12 h postfertilization until used to prevent pigmentation. Probes were synthesized with T3 RNA polymerase (Roche) by following manufacturer's instructions. Templates for in vitro transcription were amplified using primers listed in Table S3. Probes were hybridized at 65 °C overnight. Specific probe hybridization was detected with anti-DIG antibody conjugated with alkaline phosphatase (1:5,000; Roche), using Nitroblue tetrazolium chloride/5-bromo-4-chloro-3-indolyl-phosphate (Roche) as substrates. Stained larvae were observed and photographed with a Nikon SMZ-U binocular and an attached Nikon CoolPix 950 digital camera. Stained larvae were cryo-sectioned (8  $\mu\text{m}$ ), counterstained in 0.001% methyl green, mounted with VectaMount (Vector), and documented on a Zeiss Axioplan microscope and an attached AxioCamMRc5. (A and D) Lateral view of whole larvae. (B and E) Lateral view around the developing inner ear. (C and F) Ventral view of head region. Dotted circle, mouth. (G–N) Cross-sections of stained larvae at the levels of developing inner ear (G and K), mouth (H and L), pectoral fin (I and M), and branchial arches (J and N). Dorsal is to the top. White and gray arrowheads indicate the cell clusters near the lip and midbrain–hindbrain boundary, respectively. White, yellow, and black arrowheads point to labeled cells within pectoral fin (pf), otic vesicle (ov), and branchial arches (ba), respectively. e, eye; hb, hindbrain; mo, mouth cavity; op, operculum; ph, pharynx; y, yolk. (Scale bars: 50  $\mu\text{m}$ .)



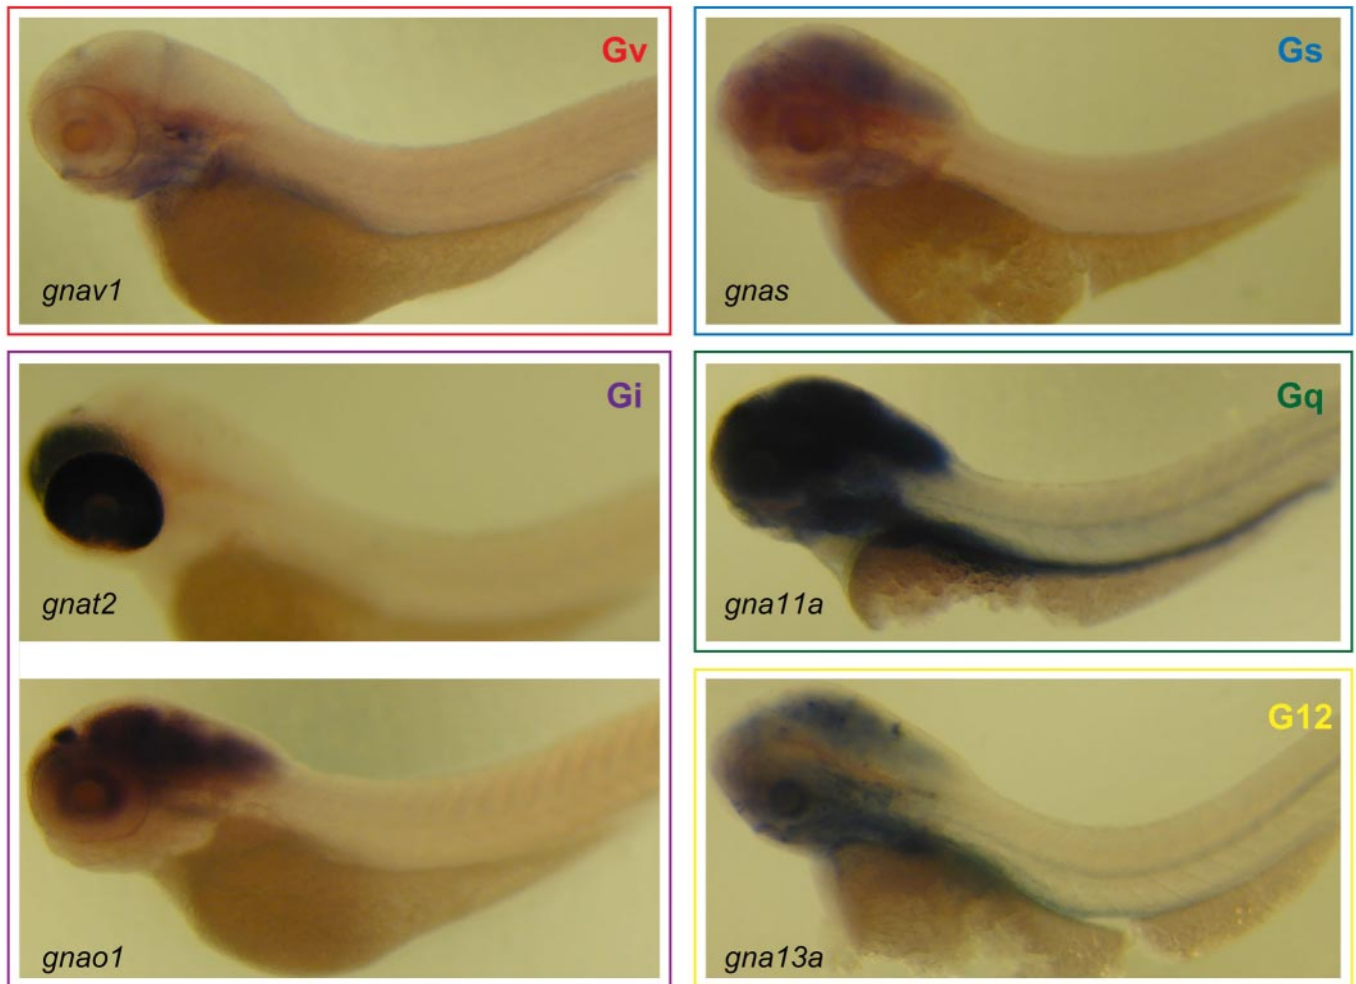

**Fig. S4.** Expression pattern of *gnav* compared to *gna* genes of the other 4 classes. Whole-mount in situ hybridization of *gnav*, *gnas*, *gnat2*, *gnao1*, *gna11a*, and *gna13a* probes with 3 dpf zebrafish larvae was performed as described in Fig. S3. All images are lateral views, and anterior is to the left. Note that expression patterns are characteristically different and none from the other 4 classes is similar to that of *gnav1*. Colored frames enclose genes from the same class (red, Gv; blue, Gs; purple, Gi; green, Gq; yellow, G12). Primers used to clone *gna* genes are as follows: *gnas*-fw, 5'-aagactgaggaccagcgaaa-3'; *gnas*-rv, 5'-gctggacaggctaactggac-3'; *gnat2*-fw, 5'-ctggtgaagctgccacagta-3'; *gnat2*-rv, 5'-gcttctacaagcgccatt-3'; *gnao1*-fw, 5'-ccagtccaacgctgtctttt-3'; *gnao1*-rv, 5'-cgctcctgtctccgtactc-3'; *gna11a*-fw, 5'-cgatcaggttctggtggaat-3'; *gna11a*-rv, 5'-tgaaggcgagttggagtct-3'; *gna13a*-fw, 5'-agaactgcacatcccttg-3'; and *gna13a*-rv, 5'-ttttgctgggcaagtagtc-3'.

**Table S1. List of teleost *gnav* genes**

| Gene              | Protein            | Ensembl                         | Chromosome   | Start      | End        | Orientation |
|-------------------|--------------------|---------------------------------|--------------|------------|------------|-------------|
| <i>Dr.gnav1</i>   | Dr_G $\alpha_{v1}$ | ENSDARG00000043006 <sup>†</sup> | 22           | 9,130,267  | 9,186,364  | -           |
| <i>Ol.gnav1</i>   | Ol_G $\alpha_{v1}$ | ENSORLG00000012122              | 1            | 31,556,132 | 31,583,202 | -           |
| <i>Ol.gnav2</i>   | Ol_G $\alpha_{v2}$ | ENSORLG00000007929              | 8            | 10,625,829 | 10,632,451 | +           |
| <i>Ga.gnav1</i>   | Ga_G $\alpha_{v1}$ | ENSGACG00000019015 <sup>†</sup> | Group IX     | 15,176,864 | 15,193,316 | -           |
| <i>Ga.gnav2</i>   | Ga_G $\alpha_{v2}$ | ENSGACG00000011158 <sup>†</sup> | Group XI     | 9,238,874  | 9,244,473  | +           |
| <i>Tr.gnav1</i>   | Tr_G $\alpha_{v1}$ | SINFRUG00000129994 <sup>‡</sup> | Scaffold 189 | 438,137    | 448,743    | -           |
| <i>Tr.gnav2</i>   | Tr_G $\alpha_{v2}$ | SINFRUG00000135273 <sup>‡</sup> | Scaffold 115 | 694,830    | 698,835    | +           |
| <i>Tn.gnav1</i> * | Tn_G $\alpha_{v1}$ | GSTENG00026255001 <sup>‡</sup>  | 18           | 2,116,654  | 2,124,011  | -           |
| <i>Tn.gnav2</i>   | Tn_G $\alpha_{v2}$ | GSTENG00018570001 <sup>‡</sup>  | 3            | 10,269,269 | 10,272,711 | +           |

The gene list of teleost *gnav* orthologs is shown. Gene identification numbers (IDs) and locations given here are derived from Ensembl release 48 (December 2007). *Dr*, zebrafish; *Ol*, medaka; *Ga*, stickleback; *Tr*, fugu; *Tn*, tetraodon. Note that a rare alternative start codon is used for Tn\_G $\alpha_{v2}$  and that a noncanonical splicing donor sequence (GC) instead of the canonical one (GT) is used for Tr\_G $\alpha_{v2}$  in intron 3 and for Tn\_G $\alpha_{v2}$  in introns 3 and 8. Other sequences used for phylogenetic analysis (Fig. 1) are as follows: XM.968117 (Tc\_G $\alpha_v$ , previously predicted as G $\alpha_2$ ); AB006548 (Ef\_G $\alpha_{v1}$ , previously named G $\alpha_6$ ); AB006549 (Ef\_G $\alpha_{v2}$ , previously named G $\alpha_7$ ); Y14247 (Gc\_G $\alpha_v$ , previously reported as G $\alpha_0$ ); EE049147 and DV496403 (Sa\_G $\alpha_{v1}$ ); AAVX01181130, AAVX01051239, AAVX01180564, AAVX01051240, AAVX01416005, AAVX01144285, and AAVX01077290 (Cm\_G $\alpha_{v1}$ ); JGI protein ID 57428 (Bf\_G $\alpha_v$ ); SPU.024792 and SPU.024793 (Sp\_G $\alpha_v$ , combined from previously named G $\alpha_{ol}$  and G $\alpha_{ol2}$ ); JGI protein IDs 185322 and 227716 (Lg\_G $\alpha_v$  and Csp\_G $\alpha_v$ ); XP-685500 (Dr\_G $\alpha_3$ ); AAS92627 (Dr\_G $\alpha_{off1}$ ); ENSDARG00000045415 (Dr\_G $\alpha_{off2}$ ); ENSDARG00000044199 (Dr\_G $\alpha_{t1}$ ); ENSDARG00000042529 (Dr\_G $\alpha_{t2}$ ); ENSDARG00000016676 (Dr\_G $\alpha_{o1}$ ); ENSDARG00000036058 (Dr\_G $\alpha_{o2}$ ); ENSDARG00000021647 (Dr\_G $\alpha_{i1a}$ ); ENSDARG00000044760 (Dr\_G $\alpha_{i1b}$ ); ENSDARG00000017294 (Dr\_G $\alpha_{i2a}$ ); NP\_001001818 (Dr\_G $\alpha_{i2b}$ ); ENSDARG00000030644 (Dr\_G $\alpha_3$ ); ENSDARG00000069358 (Dr\_G $\alpha_2$ ); ENSDARG00000011487 (Dr\_G $\alpha_q$ ); ENSDARG00000053326 (Dr\_G $\alpha_{i1a}$ ); ENSDARG00000010002 (Dr\_G $\alpha_{i1b}$ ); ENSDARG00000025013 (Dr\_G $\alpha_{i4a}$ ); BC077106 (Dr\_G $\alpha_{i4c}$ ); BC077141 (Dr\_G $\alpha_{i5a}$ ); ENSDARG00000056654 (Dr\_G $\alpha_{i5b}$ ); ENSDARG00000031543 (Dr\_G $\alpha_{i5c}$ ); ENSDARG00000063231 (Dr\_G $\alpha_{i5d}$ ); ENSDARG00000025826 (Dr\_G $\alpha_{i2}$ ); NP\_001012243 (Dr\_G $\alpha_{i3a}$ ); ENSDARG00000037924 (Dr\_G $\alpha_{i3b}$ ); NP\_000507 (Hs\_G $\alpha_3$ ); NP\_002062 (Hs\_G $\alpha_{off}$ ); NP\_000163 (Hs\_G $\alpha_{t1}$ ); NP\_005263 (Hs\_G $\alpha_{t2}$ ); NP\_001095856 (Hs\_G $\alpha_{i3}$ ); NP\_066268 (Hs\_G $\alpha_0$ ); NP\_002060 (Hs\_G $\alpha_{i1}$ ); NP\_002061 (Hs\_G $\alpha_{i2}$ ); NP\_006487 (Hs\_G $\alpha_{i3}$ ); NP\_002064 (Hs\_G $\alpha_2$ ); NP\_002063 (Hs\_G $\alpha_q$ ); NP\_002058 (Hs\_G $\alpha_{i1}$ ); NP\_004288 (Hs\_G $\alpha_{i4}$ ); NP\_002059 (Hs\_G $\alpha_{i5}$ ); NP\_031379 (Hs\_G $\alpha_{i2}$ ); NP\_006563 (Hs\_G $\alpha_{i3}$ ); NP\_477502 (Dm\_G-i $\alpha_65A$ ); NP\_523684 (Dm\_G-o $\alpha_47A$ ); NP\_725191 (Dm\_dgq); NP\_477506 (Dm\_G-s $\alpha_60A$ ); NP\_524118 (Dm\_Gf $\alpha$ ); NP\_001036421 (Dm.cta); CG30054 (Dm.CG30054); CG17760 (Dm.CG17760); CG40005 (Dm.CG40005); GCY14248 (Gc\_G $\alpha_0$ ); GCY14249 (Gc\_G $\alpha_3$ ); AB006543 (Ef\_G $\alpha_1$ ); AB006544 (Ef\_G $\alpha_2$ ); AB006545 (Ef\_G $\alpha_3$ ); AB006546 (Ef\_G $\alpha_4$ ); AB006547 (Ef\_G $\alpha_5$ ); AB006550 (Ef\_G $\alpha_8$ ); and AB006551 (Ef\_G $\alpha_9$ ).

\*A possible pseudogene (see Fig. S1).

<sup>†</sup>The predictions that lack a small part of the protein sequence (mostly N-terminal).

<sup>‡</sup>The predictions that lack  $\geq 1$  exons.

**Table S2. List of EST clones for teleost *gnav* genes**

| Gene            | EST accession   | Length (bp) | Coverage of <i>gnav</i> CDS (%) | Nucleotide identity (%) |    |
|-----------------|-----------------|-------------|---------------------------------|-------------------------|----|
| <i>Dr.gnav1</i> | CT736382.2      | 817         | 74                              | 99                      |    |
|                 | EE310328.1      | 848         | 73                              | 99                      |    |
|                 | EB899666.1      | 650         | 58                              | 99                      |    |
|                 | AL916853.1      | 539         | 18                              | 98                      |    |
|                 | DT073850.1      | 853         | 14                              | 100                     |    |
|                 | CD595967.1      | 650         | 19                              | 90                      |    |
|                 | BI983956.1      | 569         | 13                              | 100                     |    |
|                 | BG799669.1      | 444         | 10                              | 98                      |    |
|                 | CK674763.1      | 447         | 4                               | 100                     |    |
|                 | <i>Ol.gnav1</i> | AM344465.1  | 815                             | 68                      | 99 |
| AM304638.1      |                 | 770         | 64                              | 99                      |    |
| AM303462.1      |                 | 758         | 61                              | 99                      |    |
| AM317248.1      |                 | 737         | 59                              | 99                      |    |
| AM336808.1      |                 | 735         | 58                              | 99                      |    |
| AM326993.1      |                 | 689         | 55                              | 99                      |    |
| AM353138.1      |                 | 700         | 54                              | 99                      |    |
| AM315079.1      |                 | 510         | 47                              | 99                      |    |
| AM367625.1      |                 | 577         | 43                              | 100                     |    |
| AM370671.1      |                 | 350         | 26                              | 100                     |    |
| AM322694.1      |                 | 369         | 27                              | 98                      |    |
| AM383108.1      |                 | 402         | 26                              | 96                      |    |
| <i>Ol.gnav2</i> |                 | AM149874.1  | 494                             | 43                      | 99 |
| <i>Ga.gnav1</i> |                 | DN665837.1  | 1323                            | 81                      | 93 |
|                 | DN662698.1      | 1371        | 77                              | 94                      |    |
| <i>Tr.gnav2</i> | CA846482.1      | 795         | 32                              | 99                      |    |

The list of EST clones for teleost *gnav* genes identified from the NCBI database is shown. Dr, zebrafish; Ol, medaka; Ga, stickleback; Tr, fugu.

**Table S3. List of primers used for RT-PCR, cloning for full-length *gnav1*, and amplification of in vitro transcription templates**

| Primer             | Sequence                    | Use                    |
|--------------------|-----------------------------|------------------------|
| Dr-gnav1-fw        | 5'-gtgtggccgttgtttgatga-3'  | RT-PCR                 |
| Dr-gnav1-rv        | 5'-catgtcgtatccactcagag-3'  | RT-PCR                 |
| Dr-b-actin-fw      | 5'-cccattgagcacggtatt-3'    | RT-PCR                 |
| Dr-b-actin-rv      | 5'-agcggttcccctctctg-3'     | RT-PCR                 |
| Dr-gnav1-5' UTR-fw | 5'-ccaactggaccttagctcttc-3' | Full-length cloning    |
| Dr-gnav1-3' UTR-rv | 5'-ccagcatatgcttggtcatc-3'  | Full-length cloning    |
| gnav1-N-fw         | 5'-atgggtctgtgttgggctc-3'   | Template amplification |
| gnav1-N-rv         | 5'-catcaaaacaacggccacac-3'  | Template amplification |
| gnav1-M-fw         | 5'-ggtgtcgttcgtctcgcgc-3'   | Template amplification |
| gnav1-M-rv         | 5'-catgtcgtatccactcagag-3'  | Template amplification |
| T3-promoter site   | 5'-tattaaccctcactaaaggaa-3' | Template amplification |

Reverse (rv) or forward (fw) primers were attached with the T3 RNA polymerase promoter site at their 5' end for the anti-sense or sense probes, respectively.
